# Supplementary material
Source: publisher figshare collection journal article supplement (https://acs.figshare.com/ndownloader/files/5346943)
Supplement: Supplementary file 1 [file 5346943]

 
data_sad 
 
_audit_creation_method            SHELXL-97 
_chemical_name_systematic 
; 
 ? 
; 
_chemical_name_common             ? 
_chemical_melting_point           ? 
_chemical_formula_moiety          ? 
_chemical_formula_sum 
 'C24 H21 F N O5' 
_chemical_formula_weight          422.42 
 
loop_ 
 _atom_type_symbol 
 _atom_type_description 
 _atom_type_scat_dispersion_real 
 _atom_type_scat_dispersion_imag 
 _atom_type_scat_source 
 'C'  'C'   0.0033   0.0016 
 'International Tables Vol C Tables 4.2.6.8 and 6.1.1.4' 
 'H'  'H'   0.0000   0.0000 
 'International Tables Vol C Tables 4.2.6.8 and 6.1.1.4' 
 'N'  'N'   0.0061   0.0033 
 'International Tables Vol C Tables 4.2.6.8 and 6.1.1.4' 
 'O'  'O'   0.0106   0.0060 
 'International Tables Vol C Tables 4.2.6.8 and 6.1.1.4' 
 'F'  'F'   0.0171   0.0103 
 'International Tables Vol C Tables 4.2.6.8 and 6.1.1.4' 
 
_symmetry_cell_setting            Triclinic 
_symmetry_space_group_name_H-M    P21/n 
 
loop_ 
 _symmetry_equiv_pos_as_xyz 
 'x, y, z' 
 '-x+1/2, y+1/2, -z+1/2' 
 '-x, -y, -z' 
 'x-1/2, -y-1/2, z-1/2' 
 
_cell_length_a                    10.5930(3) 
_cell_length_b                    11.1116(3) 
_cell_length_c                    17.5737(5) 
_cell_angle_alpha                 90.00 
_cell_angle_beta                  95.862(3) 
_cell_angle_gamma                 90.00 
_cell_volume                      2057.70(10) 
_cell_formula_units_Z             4 
_cell_measurement_temperature     571(2) 
_cell_measurement_reflns_used     ? 
_cell_measurement_theta_min       2.15 
_cell_measurement_theta_max       24.25 
 
_exptl_crystal_description        plane 
_exptl_crystal_colour             colorless 
_exptl_crystal_size_max           0.25 
_exptl_crystal_size_mid           0.20 
_exptl_crystal_size_min           0.18 
_exptl_crystal_density_meas       ? 
_exptl_crystal_density_diffrn     1.364 
_exptl_crystal_density_method     'not measured' 
_exptl_crystal_F_000              884 
_exptl_absorpt_coefficient_mu     0.102 
_exptl_absorpt_correction_type    ? 
_exptl_absorpt_correction_T_min   0.9750 
_exptl_absorpt_correction_T_max   0.9819 
_exptl_absorpt_process_details    ? 
 
_exptl_special_details 
; 
 ? 
; 
 
_diffrn_ambient_temperature       571(2) 
_diffrn_radiation_wavelength      0.71073 
_diffrn_radiation_type            MoK\a 
_diffrn_radiation_source          'fine-focus sealed tube' 
_diffrn_radiation_monochromator   graphite 
_diffrn_measurement_device_type   'CCD area detector' 
_diffrn_measurement_method        'phi and omega scans'
_diffrn_detector_area_resol_mean  ? 
_diffrn_standards_number          ? 
_diffrn_standards_interval_count  ? 
_diffrn_standards_interval_time   ? 
_diffrn_standards_decay_%         ? 
_diffrn_reflns_number             32467 
_diffrn_reflns_av_R_equivalents   0.0545 
_diffrn_reflns_av_sigmaI/netI     0.0213 
_diffrn_reflns_limit_h_min        -12 
_diffrn_reflns_limit_h_max        12 
_diffrn_reflns_limit_k_min        -12 
_diffrn_reflns_limit_k_max        12 
_diffrn_reflns_limit_l_min        -20 
_diffrn_reflns_limit_l_max        20 
_diffrn_reflns_theta_min          2.15 
_diffrn_reflns_theta_max          24.25 
_reflns_number_total              3287 
_reflns_number_gt                 3038 
_reflns_threshold_expression      >2sigma(I) 
 
_computing_data_collection        'Bruker SMART' 
_computing_cell_refinement        'Bruker SMART' 
_computing_data_reduction         'Bruker SAINT' 
_computing_structure_solution     'SHELXS-97 (Sheldrick, 1990)' 
_computing_structure_refinement   'SHELXL-97 (Sheldrick, 1997)' 
_computing_molecular_graphics     'Bruker SHELXTL' 
_computing_publication_material   'Bruker SHELXTL' 
 
_refine_special_details 
; 
 Refinement of F^2^ against ALL reflections.  The weighted R-factor wR and 
 goodness of fit S are based on F^2^, conventional R-factors R are based 
 on F, with F set to zero for negative F^2^. The threshold expression of 
 F^2^ > 2sigma(F^2^) is used only for calculating R-factors(gt) etc. and is 
 not relevant to the choice of reflections for refinement.  R-factors based 
 on F^2^ are statistically about twice as large as those based on F, and R- 
 factors based on ALL data will be even larger. 
; 
 
_refine_ls_structure_factor_coef  Fsqd  
_refine_ls_matrix_type            full 
_refine_ls_weighting_scheme       calc  
_refine_ls_weighting_details 
 'calc w=1/[\s^2^(Fo^2^)+(0.0846P)^2^+3.1945P] where P=(Fo^2^+2Fc^2^)/3' 
_atom_sites_solution_primary      direct 
_atom_sites_solution_secondary    difmap 
_atom_sites_solution_hydrogens    geom 
_refine_ls_hydrogen_treatment     mixed 
_refine_ls_extinction_method      SHELXL 
_refine_ls_extinction_coef        0.021(4) 
_refine_ls_extinction_expression 
 'Fc^*^=kFc[1+0.001xFc^2^\l^3^/sin(2\q)]^-1/4^' 
_refine_ls_number_reflns          3287 
_refine_ls_number_parameters      281 
_refine_ls_number_restraints      0 
_refine_ls_R_factor_all           0.0728 
_refine_ls_R_factor_gt            0.0693 
_refine_ls_wR_factor_ref          0.1849 
_refine_ls_wR_factor_gt           0.1822 
_refine_ls_goodness_of_fit_ref    1.085 
_refine_ls_restrained_S_all       1.085 
_refine_ls_shift/su_max           0.000 
_refine_ls_shift/su_mean          0.000 
 
loop_ 
 _atom_site_label 
 _atom_site_type_symbol 
 _atom_site_fract_x 
 _atom_site_fract_y 
 _atom_site_fract_z 
 _atom_site_U_iso_or_equiv 
 _atom_site_adp_type 
 _atom_site_occupancy 
 _atom_site_symmetry_multiplicity 
 _atom_site_calc_flag 
 _atom_site_refinement_flags 
 _atom_site_disorder_assembly 
 _atom_site_disorder_group 
O1 O 0.4447(2) 0.6901(2) 0.01764(13) 0.0490(7) Uani 1 1 d . . . 
O2 O 0.0776(2) 0.7574(2) 0.20129(13) 0.0450(6) Uani 1 1 d . . . 
O3 O 0.2292(2) 0.60232(18) 0.11157(12) 0.0380(6) Uani 1 1 d . . . 
O5 O 0.84983(19) 1.01403(19) 0.34270(13) 0.0394(6) Uani 1 1 d . . . 
N1 N 0.2850(2) 0.8112(2) 0.23787(13) 0.0304(6) Uani 1 1 d . . . 
F1 F 0.9144(2) 1.0311(2) 0.09786(14) 0.0671(7) Uani 1 1 d . . . 
C1 C 0.8044(3) 0.9672(3) 0.08919(19) 0.0450(8) Uani 1 1 d . . . 
C2 C 0.6933(3) 1.0266(3) 0.09710(19) 0.0450(8) Uani 1 1 d . . . 
H2A H 0.6924 1.1090 0.1063 0.054 Uiso 1 1 calc R . . 
C3 C 0.5821(3) 0.9598(3) 0.09086(17) 0.0374(7) Uani 1 1 d . . . 
H3A H 0.5053 0.9971 0.0973 0.045 Uiso 1 1 calc R . . 
C4 C 0.5849(3) 0.8375(3) 0.07509(16) 0.0325(7) Uani 1 1 d . . . 
C5 C 0.6993(3) 0.7818(3) 0.06386(17) 0.0368(7) Uani 1 1 d . . . 
H5A H 0.7006 0.7008 0.0506 0.044 Uiso 1 1 calc R . . 
C6 C 0.8105(3) 0.8469(3) 0.07234(18) 0.0433(8) Uani 1 1 d . . . 
H6A H 0.8879 0.8101 0.0668 0.052 Uiso 1 1 calc R . . 
C7 C 0.4671(3) 0.7614(3) 0.07099(17) 0.0342(7) Uani 1 1 d . . . 
C8 C 0.3790(3) 0.7723(3) 0.12914(16) 0.0307(7) Uani 1 1 d . . . 
C9 C 0.3987(3) 0.8143(2) 0.20236(16) 0.0284(6) Uani 1 1 d . . . 
C10 C 0.1868(3) 0.7684(3) 0.18805(17) 0.0321(7) Uani 1 1 d . . . 
C11 C 0.2428(3) 0.7311(3) 0.11406(17) 0.0318(7) Uani 1 1 d . . . 
C14 C 0.1284(3) 0.6816(3) -0.00014(19) 0.0434(8) Uani 1 1 d . . . 
C15 C 0.1703(3) 0.7738(3) 0.04188(17) 0.0361(7) Uani 1 1 d . . . 
H15A H 0.1566 0.8541 0.0286 0.043 Uiso 1 1 calc R . . 
C16 C 0.5157(3) 0.8598(3) 0.24495(15) 0.0287(6) Uani 1 1 d . . . 
C17 C 0.5191(3) 0.9749(3) 0.27759(16) 0.0310(7) Uani 1 1 d . . . 
H17A H 0.4445 1.0192 0.2771 0.037 Uiso 1 1 calc R . . 
C18 C 0.6306(3) 1.0233(3) 0.31023(17) 0.0325(7) Uani 1 1 d . . . 
H18A H 0.6315 1.1001 0.3313 0.039 Uiso 1 1 calc R . . 
C19 C 0.7431(3) 0.9569(3) 0.31175(16) 0.0307(7) Uani 1 1 d . . . 
C20 C 0.7407(3) 0.8411(3) 0.28197(16) 0.0313(7) Uani 1 1 d . . . 
H20A H 0.8147 0.7956 0.2844 0.038 Uiso 1 1 calc R . . 
C21 C 0.6269(3) 0.7937(3) 0.24857(16) 0.0300(7) Uani 1 1 d . . . 
H21A H 0.6255 0.7164 0.2283 0.036 Uiso 1 1 calc R . . 
C22 C 0.9678(3) 0.9517(3) 0.3418(2) 0.0433(8) Uani 1 1 d . . . 
H22A H 1.0351 1.0001 0.3665 0.065 Uiso 1 1 calc R . . 
H22B H 0.9837 0.9365 0.2899 0.065 Uiso 1 1 calc R . . 
H22C H 0.9638 0.8767 0.3686 0.065 Uiso 1 1 calc R . . 
C24 C 0.2737(3) 0.8244(3) 0.31979(17) 0.0380(7) Uani 1 1 d . . . 
H24A H 0.1847 0.8264 0.3282 0.046 Uiso 1 1 calc R . . 
H24B H 0.3117 0.9000 0.3376 0.046 Uiso 1 1 calc R . . 
C25 C 0.3390(4) 0.7207(4) 0.3659(2) 0.0611(11) Uani 1 1 d . . . 
H25A H 0.4277 0.7184 0.3566 0.073 Uiso 1 1 calc R . . 
H25B H 0.3357 0.7365 0.4200 0.073 Uiso 1 1 calc R . . 
C26 C 0.2813(4) 0.6010(4) 0.3473(3) 0.0674(12) Uani 1 1 d . . . 
H26A H 0.3264 0.5404 0.3781 0.101 Uiso 1 1 calc R . . 
H26B H 0.2862 0.5835 0.2942 0.101 Uiso 1 1 calc R . . 
H26C H 0.1940 0.6017 0.3575 0.101 Uiso 1 1 calc R . . 
C13 C 0.1682(3) 0.5662(3) 0.03858(19) 0.0432(8) Uani 1 1 d . . . 
H13A H 0.0924 0.5190 0.0464 0.052 Uiso 1 1 calc R . . 
O4 O 0.2483(3) 0.4971(2) 0.00138(15) 0.0652(8) Uani 1 1 d . . . 
H4A H 0.3148 0.5337 -0.0017 0.098 Uiso 1 1 calc R . . 
 
loop_ 
 _atom_site_aniso_label 
 _atom_site_aniso_U_11 
 _atom_site_aniso_U_22 
 _atom_site_aniso_U_33 
 _atom_site_aniso_U_23 
 _atom_site_aniso_U_13 
 _atom_site_aniso_U_12 
O1 0.0473(14) 0.0582(15) 0.0418(13) -0.0220(12) 0.0065(10) -0.0080(11) 
O2 0.0314(13) 0.0541(14) 0.0496(14) -0.0023(11) 0.0056(10) -0.0105(10) 
O3 0.0453(13) 0.0265(11) 0.0389(12) -0.0016(9) -0.0123(9) -0.0035(9) 
O5 0.0289(11) 0.0369(12) 0.0506(13) -0.0108(10) -0.0053(9) -0.0027(9) 
N1 0.0291(13) 0.0300(13) 0.0320(13) -0.0012(10) 0.0026(10) -0.0008(10) 
F1 0.0491(13) 0.0740(16) 0.0770(16) 0.0126(12) 0.0001(11) -0.0252(11) 
C1 0.0375(18) 0.056(2) 0.0411(18) 0.0088(16) 0.0015(14) -0.0152(16) 
C2 0.056(2) 0.0391(18) 0.0401(18) 0.0049(14) 0.0045(15) -0.0076(16) 
C3 0.0414(18) 0.0373(17) 0.0338(16) 0.0019(13) 0.0051(13) 0.0000(14) 
C4 0.0331(16) 0.0400(17) 0.0246(14) 0.0001(12) 0.0030(11) 0.0002(13) 
C5 0.0379(17) 0.0432(17) 0.0300(15) -0.0006(13) 0.0061(12) 0.0019(14) 
C6 0.0361(18) 0.060(2) 0.0347(17) 0.0065(15) 0.0065(13) 0.0055(15) 
C7 0.0341(16) 0.0346(16) 0.0329(16) -0.0051(13) -0.0016(12) 0.0021(13) 
C8 0.0302(15) 0.0283(15) 0.0331(15) -0.0032(12) 0.0007(12) -0.0014(12) 
C9 0.0286(15) 0.0235(13) 0.0327(15) -0.0012(11) 0.0009(11) 0.0009(11) 
C10 0.0319(17) 0.0270(15) 0.0368(16) 0.0025(12) 0.0005(12) -0.0027(12) 
C11 0.0340(16) 0.0243(14) 0.0357(16) -0.0005(12) -0.0038(12) -0.0034(12) 
C14 0.0399(18) 0.0464(19) 0.0410(18) -0.0009(15) -0.0099(14) -0.0015(15) 
C15 0.0340(16) 0.0356(16) 0.0377(17) 0.0074(13) -0.0012(13) 0.0017(13) 
C16 0.0301(15) 0.0296(14) 0.0260(14) -0.0023(11) 0.0011(11) -0.0002(12) 
C17 0.0296(15) 0.0309(15) 0.0320(15) -0.0043(12) 0.0007(11) 0.0030(12) 
C18 0.0362(16) 0.0273(14) 0.0333(15) -0.0066(12) 0.0002(12) -0.0007(12) 
C19 0.0287(15) 0.0322(15) 0.0302(14) -0.0017(12) -0.0023(11) -0.0031(12) 
C20 0.0296(15) 0.0315(15) 0.0325(15) -0.0011(12) 0.0013(12) 0.0035(12) 
C21 0.0331(16) 0.0273(14) 0.0294(14) -0.0032(11) 0.0014(12) 0.0001(12) 
C22 0.0265(16) 0.0480(19) 0.054(2) -0.0070(16) -0.0026(14) 0.0001(14) 
C24 0.0412(18) 0.0406(17) 0.0332(16) -0.0070(13) 0.0088(13) -0.0032(14) 
C25 0.061(2) 0.073(3) 0.049(2) 0.0040(19) 0.0012(18) -0.007(2) 
C26 0.069(3) 0.053(2) 0.076(3) 0.024(2) -0.014(2) -0.012(2) 
C13 0.0451(19) 0.0386(17) 0.0427(18) -0.0108(14) -0.0114(14) -0.0033(14) 
O4 0.086(2) 0.0556(16) 0.0523(16) -0.0159(13) -0.0028(14) 0.0015(15) 
 
_geom_special_details 
; 
 All esds (except the esd in the dihedral angle between two l.s. planes) 
 are estimated using the full covariance matrix.  The cell esds are taken 
 into account individually in the estimation of esds in distances, angles 
 and torsion angles; correlations between esds in cell parameters are only 
 used when they are defined by crystal symmetry.  An approximate (isotropic) 
 treatment of cell esds is used for estimating esds involving l.s. planes. 
; 
 
loop_ 
 _geom_bond_atom_site_label_1 
 _geom_bond_atom_site_label_2 
 _geom_bond_distance 
 _geom_bond_site_symmetry_2 
 _geom_bond_publ_flag 
O1 C7 1.232(4) . ? 
O2 C10 1.209(4) . ? 
O3 C13 1.433(4) . ? 
O3 C11 1.439(3) . ? 
O5 C19 1.361(3) . ? 
O5 C22 1.430(4) . ? 
N1 C10 1.375(4) . ? 
N1 C9 1.412(4) . ? 
N1 C24 1.464(4) . ? 
F1 C1 1.360(4) . ? 
C1 C2 1.369(5) . ? 
C1 C6 1.372(5) . ? 
C2 C3 1.387(5) . ? 
C3 C4 1.388(5) . ? 
C4 C5 1.392(4) . ? 
C4 C7 1.503(4) . ? 
C5 C6 1.377(5) . ? 
C7 C8 1.457(4) . ? 
C8 C9 1.365(4) . ? 
C8 C11 1.511(4) . ? 
C9 C16 1.471(4) . ? 
C10 C11 1.540(4) . ? 
C11 C15 1.492(4) . ? 
C14 C15 1.313(5) . ? 
C14 C13 1.493(5) . ? 
C16 C21 1.384(4) . ? 
C16 C17 1.401(4) . ? 
C17 C18 1.369(4) . ? 
C18 C19 1.400(4) . ? 
C19 C20 1.388(4) . ? 
C20 C21 1.389(4) . ? 
C24 C25 1.533(5) . ? 
C25 C26 1.486(6) . ? 
C13 O4 1.360(4) . ? 
 
loop_ 
 _geom_angle_atom_site_label_1 
 _geom_angle_atom_site_label_2 
 _geom_angle_atom_site_label_3 
 _geom_angle 
 _geom_angle_site_symmetry_1 
 _geom_angle_site_symmetry_3 
 _geom_angle_publ_flag 
C13 O3 C11 109.9(2) . . ? 
C19 O5 C22 117.5(2) . . ? 
C10 N1 C9 110.6(2) . . ? 
C10 N1 C24 121.9(2) . . ? 
C9 N1 C24 126.2(2) . . ? 
F1 C1 C2 118.2(3) . . ? 
F1 C1 C6 118.4(3) . . ? 
C2 C1 C6 123.4(3) . . ? 
C1 C2 C3 117.8(3) . . ? 
C2 C3 C4 120.3(3) . . ? 
C3 C4 C5 120.0(3) . . ? 
C3 C4 C7 121.7(3) . . ? 
C5 C4 C7 118.3(3) . . ? 
C6 C5 C4 119.9(3) . . ? 
C1 C6 C5 118.5(3) . . ? 
O1 C7 C8 120.0(3) . . ? 
O1 C7 C4 119.5(3) . . ? 
C8 C7 C4 120.5(2) . . ? 
C9 C8 C7 130.0(3) . . ? 
C9 C8 C11 108.6(2) . . ? 
C7 C8 C11 121.4(3) . . ? 
C8 C9 N1 110.7(2) . . ? 
C8 C9 C16 129.6(3) . . ? 
N1 C9 C16 119.7(2) . . ? 
O2 C10 N1 126.1(3) . . ? 
O2 C10 C11 126.4(3) . . ? 
N1 C10 C11 107.4(2) . . ? 
O3 C11 C15 104.4(2) . . ? 
O3 C11 C8 113.4(2) . . ? 
C15 C11 C8 116.9(3) . . ? 
O3 C11 C10 104.3(2) . . ? 
C15 C11 C10 115.0(3) . . ? 
C8 C11 C10 102.4(2) . . ? 
C15 C14 C13 110.5(3) . . ? 
C14 C15 C11 110.2(3) . . ? 
C21 C16 C17 118.6(3) . . ? 
C21 C16 C9 120.7(2) . . ? 
C17 C16 C9 120.5(3) . . ? 
C18 C17 C16 121.0(3) . . ? 
C17 C18 C19 119.8(3) . . ? 
O5 C19 C20 124.4(3) . . ? 
O5 C19 C18 115.6(3) . . ? 
C20 C19 C18 119.9(3) . . ? 
C19 C20 C21 119.5(3) . . ? 
C16 C21 C20 121.1(3) . . ? 
N1 C24 C25 111.6(3) . . ? 
C26 C25 C24 113.7(3) . . ? 
O4 C13 O3 110.0(3) . . ? 
O4 C13 C14 115.3(3) . . ? 
O3 C13 C14 104.3(2) . . ? 
 
_diffrn_measured_fraction_theta_max    0.988 
_diffrn_reflns_theta_full              24.25 
_diffrn_measured_fraction_theta_full   0.988 
_refine_diff_density_max    1.429 
_refine_diff_density_min   -0.353 
_refine_diff_density_rms    0.062 
